# Supplementary material for: Describing, predicting and explaining adherence to total skin self-examination (TSSE) in people with melanoma: a 12-month longitudinal study
Source: HighWire-hosted journal article supplement (doi:10.1136/bmjopen-2021-056755), 2022-08-01
Supplement: bmjopen-2021-056755supp001_data_supplement.pdf [file bmjopen-2021-056755supp001_data_supplement.pdf]

## Supplementary File S1

### Multivariate analyses

The main analyses reported in the manuscript are univariate logistic regressions. As a supplementary analysis, any predictors that were significant at  $p < .1$  were entered into further multivariate analyses. These multivariate analyses are shown below in Tables S1 and S2.

When intention, anxiety and depression (i.e. all predictors where  $p < .1$ ) were included in the analysis of non-adherent versus adherent participants, intentions about TSSE and depression remained significant, each explaining unique variance. People who were non-adherent were more depressed and more likely to intend to conduct TSSE more frequently than recommended than people who were adherent.

When action planning and self-efficacy (as predictors where  $p < .1$ ) were included in a multivariate analysis of the drop offs versus the adherent participants, neither was significant. This may reflect the fact that efficacy is a theoretical precursor of action planning, and as such, the two will be highly inter-related and may explain the same variance.

Table S1: Multivariate logistic regression analyses of demographic, cognitive and emotional factors in people who are **non-adherent** (comparison group) **vs adherent**.

|                            | <b>B</b> | <b>SE</b> | <b>Wald</b> | <b>p</b> | <b>OR</b> | <b>95% CI OR</b> |
|----------------------------|----------|-----------|-------------|----------|-----------|------------------|
| <b><u>Multivariate</u></b> |          |           |             |          |           |                  |
| Rurality                   | -0.91    | 0.64      | 2.05        | 0.152    | 0.40      | [.12,1.40]       |
| Intention<12               | -1.69    | 0.84      | 4.09        | 0.043*   | 0.18      | [.04,.95]        |
| Intention=12               | -1.70    | 0.74      | 5.31        | 0.021*   | 0.18      | [.04,.78]        |
| HADS Anxiety               | -0.01    | 0.09      | 0.03        | 0.87     | 0.99      | [.83,1.17]       |
| HADS Depression            | 0.34     | 0.15      | 4.91        | 0.027*   | 1.40      | [1.04,1.89]      |

\* =significant at  $p < .05$ . \*\* Intention >12 used as comparison

Table S2: Multivariate logistic regression analyses of demographic, cognitive and emotional factors in people whose adherence **dropped-off** over time (comparison group) vs people who are adherent

|                            | <b>B</b> | <b>SE</b> | <b>Wald</b> | <b>p</b> | <b>OR</b> | <b>95% CI OR</b> |
|----------------------------|----------|-----------|-------------|----------|-----------|------------------|
| <b><u>Multivariate</u></b> |          |           |             |          |           |                  |
| Action Plan                | -0.14    | 0.13      | 1.13        | 0.289    | 0.87      | [.68,1.12]       |
| Self-efficacy              | -0.05    | 0.05      | 1.47        | 0.225    | 0.95      | [.87,1.03]       |
| HADS depression            | 0.14     | 0.09      | 2.28        | 0.132    | 1.15      | [.96,1.38]       |

\* =significant at  $p < .05$ . \*\* Intention  $> 12$  used as comparison
